# Supplementary material
Source: publisher figshare collection journal article supplement (https://karger.figshare.com/ndownloader/files/14065151)
Supplement: Supplementary file 1 [file 14065151]

**Table S1. Characteristics of prenatally resolved intra-abdominal cysts in female fetuses diagnosed in the third trimester, that were considered ovarian cysts.**

| **GA at presentation (weeks)** | **Size at presentation (mm)** | **Location** | **Characteristics** | **Interval between diagnosis and regression (weeks)** |
| --- | --- | --- | --- | --- |
| 28.9 | 24x27 | Right lower abdomen, cranial to the bladder | Echolucent, unilocular | 4.0 |
| 29.6 | 12x13x13 | Right lower abdomen | Echolucent, unilocular, no flow | 2.6 |
| 30.6 | 20x19 | Right lower abdomen, next to bladder | Echolucent with some debris | 3.0 |
| 30.6 | 35x26x28 | Left lower abdomen, between kidney and bladder | Echolucent, unilocular, no flow | 5.0 |
| 30.7 | 23x25x24 | Right lower abdomen, next to bladder | Echolucent, unilocular, no flow | 4.0 |
| 31.4 | 38x37x34 | Right lower abdomen, next to bladder | Echolucent, unilocular | 6.7 |
| 33.1 | 43x30x34 | Left lower abdomen, between kidney and bladder | Echolucent, bilocular, no flow. | 3.0 |
| 34.9 | 33x28x32 | Left lower abdomen | Inhomogeneous, multilocular | 2.0 |

**Table S2. Characteristics of postnatally resolved intra-abdominal cysts in female fetuses diagnosed in the third trimester, that were considered ovarian cysts.**

| **GA at presentation (weeks)** | **Size at presentation (mm)** | **Location** | **Characteristics** | **Interval between birth and regression (weeks)** |
| --- | --- | --- | --- | --- |
| 30.3 | 11x12x10 | Left lower abdomen | Echolucent, cyst-in-cyst | 0.1 |
| 30.7 | 32x26x33 | Right lower abdomen | Echodens, solid, no flow | 16.7 |
| 30.9 | 32x34x34 | Left lower abdomen | Echolucent, unilocular | 17.9 |
| 31.0 | 20x23x18 | Left lower abdomen | Echolucent, unilocular, no flow | 38.3 |
| 31.1 | 35x36x39 | Left lower abdomen | Echolucent, unilocular | 14.4 |
| 31.1 | 24x18x22 | Left lower abdomen | Echolucent, unilocular, no flow | 0.6 |
| 31.1 | 14x19x19 | Left lower abdomen, between kidney and bladder | Echolucent | 1.7 |
| 31.3 | 44x36x37 | Left lower abdomen | Echolucent with little debris, unilocular | 29.6 |
| 31.4 | 31x36x37 | Left lower abdomen | Echolucent, multilocular, no flow | 2.3 |
| 31.4 | 30x31x40 | Left lower abdomen | Echolucent, unilocular | 26 |
| 31.6 | 33x32x33 | Left lower abdomen | Echolucent, unilocular | 21.4 |
| 31.7 | 51 | Left lower abdomen | Echolucent with echodens cyst in cyst ø 35mm | 12.7 |
| 31.7 | 16x17x16 | Left lower abdomen, between kidney and bladder | Echolucent, unilocular | 6.4 |
| 31.9 | 11x9x10 | Left lower abdomen, adjacent to bladder | Echolucent, unilocular, no flow | 0.7 |
| 32.0 | 13x12x10 | Right lower abdomen, cranial to bladder | Echolucent, multilocular | 0.6 |
| 32.0 | 59x51x47 | Right lower abdomen | Multilocular, debris, no flow | 5.6 |
| 32.0 | 27x27x26 | Left lower abdomen | Echolucent, multilocular | 1.0 |
| 32.0 | 59x51x47 | Right lower abdomen | Multilocular, debris, no flow | 5.6 |
| 32.0 | 42x53x58 | Left lower abdomen | Echolucent, unilocular, no flow | 28.0 |
| 32.1 | 28x27x29 | Right lower abdomen | Inhomogeneous, appearance of organized clot | 13.7 |
| 32.1 | 27x32x38 | Left lower abdomen | Echolucent, unilocular, no flow or debris | 9.0 |
| 32.3 | 23x32x31 | Right lower abdomen | Echolucent, unilocular | 1.7 |
| 32.4 | 13x14x15 | Left lower abdomen, between kidney and bladder | Echolucent, unilocular, no flow | 2.0 |
| 32.6 | 35x28x33 | Right lower abdomen, adjacent to kidney | Echolucent, unilocular, no flow | 32,1 |
| 32.6 | 18x20x14 | Central in lower abdomen | Echolucent, unilocular | 1.3 |
| 32.7 | 33x34x27 | Left lower abdomen | Echolucent, unilocular | 3.3 |
| 32.7 | 42x36x33 | Left lower abdomen | Echolucent, unilocular, no flow | 4.9 |
| 32.9 | 50x43x44 | Left lower abdomen | Echolucent, unilocular, no flow | 3.3 |
| 32.9 | 24x28x27 | Left lower abdomen, between kidney and bladder | Echolucent with septum, no flow | 12.7 |
| 33.0 | 43x43x52 | Left, lower abdomen, from pelvis till stomach | Echolucent, unilocular | 23.0 |
| 33.1 | 43x34x48 | Left lower abdomen | Echolucent, unilocular | 3.4 |
| 33.7 | 30x30x32 | Right lower abdomen, adjacent to bladder | Echolucent, unilocular, no flow | 10,3 |
| 34.0 | 24x24x21 | Left lower abdomen, adjacent to bladder | Echolucent, unilocular | 4.9 |
| 34.0 | 42x39x41 | Left lower abdomen | Inhomogeneous, appearance of organized clot | 36.0 |
| 34.4 | 29x30x24 | Left lower abdomen | Echolucent with some debris | 19.6 |
| 34.7 | 53x50x56 | Left lower abdomen | Echolucent, daughter cyst sign | 10.7 |
| 34.7 | 18x14x17 | Right lower abdomen | Echolucent, bilocular, no flow | 5.4 |
| 34.9 | 25x25x26 | Left lower abdomen | Echolucent, unilocular, no flow | 15.7 |
| 34.9 | 72x50x64 | Left lower abdomen | Echolucent, unilocular, no flow | 18.4 |
| 35.0 | 64x52x58 | Left lower abdomen | Echolucent with some debris, no flow | 24.6 |
| 35.6 | 22x29x23 | Right lower abdomen | Homogeneous, unilocular | 17.9 |
| 35.7 | 42x43x41 | Right lower abdomen | Echolucent, unilocular, no flow | 23.7 |
| 35.9 | 15x18x16 | Right lower abdomen | Echolucent with septae | 2,3 |
| 36.3 | 82x67x74 | Left lower abdomen, between bladder and stomach | Echodens, no flow, appearance of organized clot | 51.1 |
| 36.9 | 30x31x22 | Left lower abdomen | Echolucent, unilocular | 45.3 |
| 38.3 | 35x22x23 | Left lower abdomen | Echolucent, trilocular | unknown |
